# Supplementary material
Source: publisher site journal article supplement (https://www.dovepress.com/article/321789)
Supplement: Supplementary file 1 [file get_supplementary_file.php]

**Supplementary Table S1** Signal Detection of Adverse Event Symptoms of More Than 2000 Instances of Associated Off-label Drug Use from FAERS

| **Drug** | **SMQ** | **Event (n)** | **PRR**  **(kai)** | **ROR**  **(95% CI)** | **IC**  **(95% CI)** | **EBGM**  **(90%CI)** |
| --- | --- | --- | --- | --- | --- | --- |
| Warfarin | Haemorrhage term (excl laboratory terms) | 4378 | 2.79  (5472.00) | 3.68  (3.54, 3.82) | 1.44  (1.44, 1.44) | 2.71  (2.64, 2.78) |
| Leflunomide | Lack of efficacy/effect | 4279 | 11.21  (37510.41) | 22.19  (21.23, 23.20) | 3.34  (3.34, 3.34) | 10.13  (9.88, 10.39) |
| Diazepam | Anticholinergic syndrome | 4149 | 2.63  (4541.12) | 3.34  (3.21, 3.46) | 1.35  (1.35, 1.35) | 2.56  (2.49, 2.62) |
| Levetiracetam | Convulsions | 4134 | 14.38  (43280.01) | 21.27  (20.43, 22.15) | 3.57  (3.57, 3.58) | 11.93  (1.63, 12.24) |
| Lansoprazole | Acute renal failure | 4078 | 4.46  (10121.16) | 5.22  (5.07, 5.41) | 2.02  (2.02, 2.02) | 4.05  (3.95, 4.16) |
| Ambrisentan | Acute central respiratory depression | 4042 | 4.46  (10500.46) | 5.56  (5.36, 5.77) | 2.05  (2.05, 2.05) | 4.15  (4.05, 4.26) |
| Abatacept | Lack of efficacy/effect | 3997 | 8.39  (24707.68) | 13.15  (12.62, 13.70) | 2.94  (2.94, 2.94) | 7.66  (7.49, 7.86) |
| Tocilizumab | Lack of efficacy/effect | 5210 | 12.30  (45347.79) | 18.38  (17.73, 19.06) | 3.34  (3.34, 3.34) | 10.15  (9.92, 10.38) |
| Albuterol | Asthma/bronchospasm | 3680 | 7.81  (19820.99) | 10.15  (9.75 10.56) | 2.80  (2.80 2.80) | 6.95  (6.76 7.14) |
| Tocilizumab | Lack of efficacy/effect | 3634 | 12.51  (36911.72) | 28.86  (27.41 30.39) | 3.52  (3.52 3.52) | 11.47  (11.16 11.79) |
| Metformin | Acute renal failure | 3532 | 2.43  (2806.94) | 2.60  (2.50 2.69) | 1.19  (1.19 1.20) | 2.29  (2.22 2.35) |
| Risperidone | Hyperglycaemia/new onset diabetes mellitus | 3407 | 3.46  (6247.41) | 4.54  (4.36 4.73) | 1.74  (1.74 1.74) | 3.34  (3.25 3.43) |
| Hydroxychloroquine | Arthritis | 3379 | 11.33  (307446.21) | 23.32  (22.17 24.53) | 3.39  (3.39 3.39) | 10.47  (10.17 10.76) |
| Furosemide | Haematopoietic erythropenia | 3218 | 2.47  (2534.79) | 2.58  (2.49 2.68) | 1.19  (1.19 1.19) | 2.28  (2.21 2.35) |
| Infliximab | Lack of efficacy/effect | 3110 | 8.42  (19795.61) | 13.41  (12.80 14.05) | 2.97  (2.97 2.97) | 7.85  (7.62 8.09) |
| Hydroxychloroquine | Lack of efficacy/effect | 3095 | 10.33  (25404.08) | 19.38  (18.43 20.39) | 3.26  (3.26 3.26) | 9.62  (9.34 9.91) |
| Metformin | Lactic acidosis | 3054 | 14.07  (22800.53) | 15.34  (14.63 16.07) | 3.16  (3.16 3.16) | 8.96  (8.69 9.23) |
| Oxycodone | Drug abuse and dependence | 2967 | 5.55  (10728.16) | 7.07  (6.77 7.38) | 2.38  (2.38 2.38) | 5.20  (5.04 5.36) |

| **Drug** | **SMQ** | **Event (n)** | **PRR**  **(kai)** | **ROR**  **(95% CI)** | **IC**  **(95% CI)** | **EBGM**  **(90%CI)** |
| --- | --- | --- | --- | --- | --- | --- |
| Sulfasalazine | Lack of efficacy/effect | 2945 | 10.19  (23866.17) | 18.93  (17.98 19.93) | 3.25  (3.25 3.25) | 9.52  (9.24 9.82) |
| Rituximab | Lack of efficacy/effect | 2940 | 7.22  (15394.82) | 10.51  (10.04 11.00) | 2.76  (2.76 2.76) | 6.77  (6.56 6.97) |
| Duloxetine | Anticholinergic syndrome | 2898 | 2.32  (2397.56) | 2.81  (2.69 2.93) | 1.19  (1.19 1.19) | 2.28  (2.21 2.35) |
| Alprazolam | Drug abuse and dependence | 2885 | 3.60  (5250.35) | 4310  (3.94 4.28) | 1.76  (1.76 1.77) | 3.40  (3.29 3.50) |
| Pantoprazole | Acute renal failure | 2820 | 2.43  (2277.75) | 2.59  (2.49 2.70) | 1.21  (1.21 1.21) | 2.31  (2.24 2.38) |
| Quetiapine | Anticholinergic syndrome | 2802 | 2.71  (3332.17) | 3.50  (3.34 3.66) | 1.41  (1.41 1.41) | 2.66  (2.58 2.74) |
| Denosumab | Osteonecrosis | 2789 | 17.01  (33021.93) | 21.21  (20.25 22.22) | 3.74  (3.74 3.74) | 13.38  (12.97 13.80) |
| Denosumab | Accidents and injuries | 2730 | 2.82  (3307.09) | 3.29  (3.15 3.43) | 1.45  (1.45 1.45) | 2.73  (2.65 2.82) |
| Acetaminophen | Hepatic failure, fibrosis and cirrhosis and other liver damage-related conditions | 2718 | 3.45  (3982.36) | 3.61  (3.46 3.76) | 1.60  (1.59 1.60) | 3.02  (2.92 3.11) |
| Duloxetine | Neuroleptic malignant syndrome | 2676 | 2.29  (2125.19) | 2.72  (2.60 2.84) | 1.17  (1.17 1.17) | 2.25  (2.18 2.32) |
| Tofacitinib | Lack of efficacy/effect | 2583 | 14.28  (31467.48) | 43.41  (40.49 46.54) | 3.74  (3.74 3.74) | 13.42  (12.99 13.86) |
| Rabeprazole | Chronic kidney disease | 2564 | 16.27  (34518.46) | 32.51  (30.71 34.42) | 3.89  (3.89 3.89) | 14.84  (14.36 15.33) |
| Risperidone | Lipodystrophy | 2542 | 113.88  (109113.74) | 147.31 (137.84  157.43) | 545  (5.45 5.45) | 43.99  (42.57 45.44) |
| Diazepam | Drug abuse and dependence | 2496 | 3.97  (5440.38) | 4.63  (4.43 4.84) | 1.92  (1.91 1.92) | 3.77  (3.65 3.89) |
| Olanzapine | Anticholinergic syndrome | 2439 | 2.40  (2191.41) | 2.94  (2.80 3.08) | 1.24  (1.24 1.24) | 2.36  (2.28 2.44) |
| Alprazolam | Suicide/self-injury | 2428 | 3.41  (4009.77) | 3.80  (3.63 3.97) | 1.69  (1.69 1.69) | 3.23  (3.13 3.34) |
| Clonazepam | Suicide/self-injury | 2420 | 3.77  (4777.64) | 4.27  (4.08 4.46) | 1.84  (1.84 1.84) | 3.57  (3.45 3.69) |
| Duloxetine | Dementia | 2323 | 3.85  (4946.41) | 4.64  (4.43 4.86) | 1.89  (1.89 1.89) | 3.70  (3.58 3.83) |

| **Drug** | **SMQ** | **Event (n)** | **PRR**  **(kai)** | **ROR**  **(95% CI)** | **IC**  **(95% CI)** | **EBGM**  **(90%CI)** |
| --- | --- | --- | --- | --- | --- | --- |
| Aripiprazole | Dementia | 2316 | 2.83  (2771.11) | 3.18  (3.04 3.33) | 1.45  (1.45 1.45) | 2.74  (2.64 2.83) |
| Dexamethasone | Agranulocytosis | 2308 | 2.55  (2043.33) | 2.68  (2.56 2.80) | 1.27  (1.27 1.27) | 2.41  (2.33 2.49) |
| Methotrexate | Infective pneumonia | 2301 | 2.61  (2183.82) | 2.77  (2.65 2.90) | 1.31  (1.31 1.31) | 2.48  (2.40 2.56) |
| Esomeprazole | Acute renal failure | 2286 | 3.62  (4239.19) | 4.09  (3.91 4.29) | 1.79  (1.78 1.79) | 3.44  (3.33 3.56) |
| Hydroxychloroquine | Lack of efficacy/effect | 2267 | 10.02  (18317.71) | 18.58  (17.52 19.69) | 3.25  (3.25 3.25) | 9.51  (9.19 9.85) |
| Olanzapine | Neuroleptic malignant syndrome | 2114 | 2.22  (1549.20) | 2.60  (2.48 2.74) | 1.13  (1.13 1.13) | 2.18  (2.11 2.26) |
| Treprostinil | Gastrointestinal nonspecific symptoms and therapeutic procedures | 2094 | 2.17  (1465.90) | 2.57  (2.44 2.70) | 1.10  (1.10 1.10) | 2.14  (2.07 2.22) |
| Diazepam | Suicide/self-injury | 2084 | 3.73  (4087.76) | 4.22  (4.03 4.43) | 1.83  (1.83 1.83) | 3.56  (3.43 3.69) |
| Clozapine | Neuroleptic malignant syndrome | 2069 | 2.27  (1605.84) | 2.68  (2.55 2.82) | 1.16  (1.16 1.16) | 2.23  (2.15 2.31) |
| Omeprazole | Acute renal failure | 2052 | 4.44  (5396.68) | 5.24  (4.99 5.51) | 2.08  (2.08 2.08) | 4.24  (4.09 4.39) |
| Olmesartan | Gastrointestinal nonspecific symptoms and therapeutic procedures | 2031 | 2.88  (2773.88) | 3.84  (3.64 4.05) | 1.51  (1.51 1.51) | 2.84  (2.74 2.94) |
| Methotrexate | Haemodynamic oedema, effusions and fluid overload | 2019 | 4.08  (4236.18) | 4.35  (4.15 4.57) | 1.89  (1.89 1.89) | 3.71  (3.58 3.85) |
| Venlafaxine | Suicide/self-injury | 2011 | 4.43  (52436.17) | 5.18  (4.93 5.44) | 2.08  (2.08 2.08) | 4.22  (4.07 4.38) |

FAERS, Food and Drug Administration Adverse Event Reporting System; SMQ, Standardised Medical Dictionary for Regulatory Activities Queries; PRR, proportional reporting ratio; ROR, the reporting odds ratio, IC, information component; EBGM, empirical Bayes geometric mean; CI, confidence interval
